# Supplementary material
Source: Springer Nature journal article supplement (https://www.springermedizin.de/resource/supplementary/12943_2002_10_MOESM9_ESM.pdf/9553258)

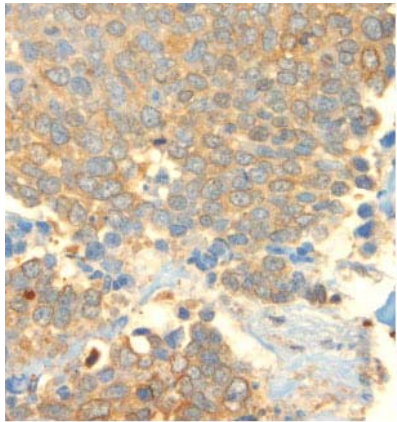

1+

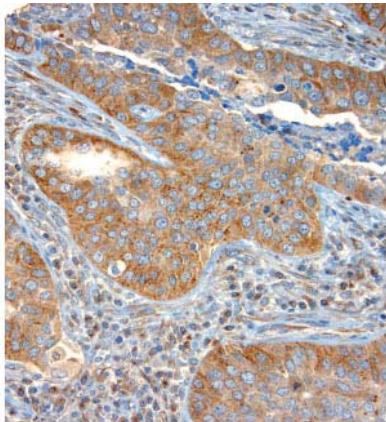

2+

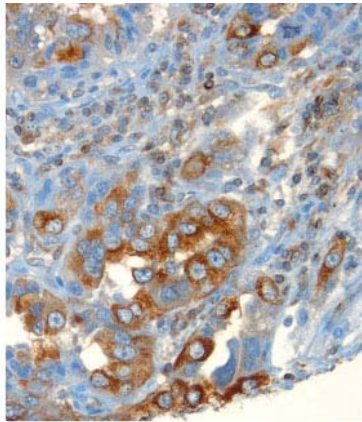

3+

Supplement: MOESM9 [file 9553258]
